# Supplementary material
Source: ML conference proceedings conference paper supplement (https://openaccess.thecvf.com/content/CVPR2024/html/Wang_Unsupervised_3D_Structure_CVPR_2024_paper.html)
Supplement: Supplementary file 1 [file Wang_Unsupervised_3D_Structure_CVPR_2024_supplemental.zip]

Archive with 18 entries (18 files):
- supplementary material/bird_shape_1.mp4
- supplementary material/bird_shape_2.mp4
- supplementary material/cat_shape_1.mp4
- supplementary material/cat_shape_2.mp4
- supplementary material/cheetah_shape_1.mp4
- supplementary material/cheetah_shape_2.mp4
- supplementary material/dog_shape_1.mp4
- supplementary material/dog_shape_2.mp4
- supplementary material/face_shape_1.mp4
- supplementary material/face_shape_2.mp4
- supplementary material/fox_shape_1.mp4
- supplementary material/fox_shape_2.mp4
- supplementary material/horse_shape_1.mp4
- supplementary material/horse_shape_2.mp4
- supplementary material/readme.txt
- supplementary material/supplementary material.pdf
- supplementary material/tiger_shape_1.mp4
- supplementary material/tiger_shape_2.mp4
