# Supplementary material
Source: ML conference proceedings conference paper supplement (https://openaccess.thecvf.com/content/CVPR2024/html/Wang_Unsupervised_3D_Structure_CVPR_2024_paper.html)
Supplement: Supplementary file 1 [file Wang_Unsupervised_3D_Structure_CVPR_2024_supplemental.zip › supplementary material/readme.txt]

1. 14117_supplementary.PDF file consists of more discussion and figures.
2. For Celaba_wild, AFHQ (cat, dog, tiger, cheetach, fox subsets), CUB-200-2011 and Horse datasets,
we each include two videos of animation for better visualization of the 3D shapes. namely
face_shape_1.mp4, face_shape_2.mp4, cat_shape_1.mp4, cat_shape_2.mp4,
dog_shape_1.mp4, dog_shape_2.mp4, tiger_shape_1.mp4, tiger_shape_2.mp4,
cheetah_shape_1.mp4, cheetah_shape_2.mp4, fox_shape_1.mp4, fox_shape_2.mp4,
bird_shape_1.mp4, bird_shape_2.mp4, horse_shape_1.mp4, horse_shape_2.mp4.
